# Supplementary material for: Effect of surface properties of TiO2 on the performance of Pt/TiO2 catalysts for furfural hydrogenation
Source: Royal Society of Chemistry journal article supplement (doi:10.1039/d1ra07220j), 2022-01-01
Supplement: d1ra07220j1.pdf [file d1ra07220j1.pdf]

## **Supplementary Materials**

### **Effect of surface properties of TiO<sub>2</sub> on the performance of Pt/TiO<sub>2</sub> catalysts for furfural hydrogenation**

Mi Yeon Byun <sup>a,b</sup>, Ye Eun Kim <sup>a,d</sup>, Jae Ho Baek <sup>a</sup>, Jungho Jae <sup>c+</sup>, and  
Man Sig Lee <sup>a,e+</sup>

<sup>a</sup> Ulsan Division, Korea Institute of Industrial Technology (KITECH), Ulsan 44413,  
Republic of Korea

<sup>b</sup> Department of Polymer Science and Chemical Engineering, Pusan National University,  
Busan 46241, Republic of Korea

<sup>c</sup> School of Chemical Engineering, Pusan National University, Busan 46241, Republic  
of Korea

<sup>d</sup> Department of Chemical and Biological Engineering, Korea University, Seoul 02841,  
Republic of Korea

<sup>e</sup> Department of Green Process and System Engineering, University of Science and  
Technology (UST), Ulsan 44413, South Korea

<sup>+</sup>Correspondence: Tel: +82-52-980-6630, Fax: +82-52-980-6639,

E-mail: [lms5440@kitech.re.kr](mailto:lms5440@kitech.re.kr) (M.S. Lee)

Correspondence: Tel: +82-51-510-2989,

E-mail: [jh.jae@pusan.ac.kr](mailto:jh.jae@pusan.ac.kr) (J. Jae)

## **Table captions**

**Table S1.** Comparison of furfural hydrogenation over various catalysts

**Table S1.** Comparison of furfural hydrogenation over various catalysts

| <b>Catalysts</b>          | <b>Furfural (mmol)</b> | <b>Solvent</b> | <b>Temp. (°C)</b> | <b>Pressure (bar)</b> | <b>Time (h)</b> | <b>Conversion (%)</b> | <b>CPO Yield (%)</b> | <b>Ref..</b> |
|---------------------------|------------------------|----------------|-------------------|-----------------------|-----------------|-----------------------|----------------------|--------------|
| Pt/C                      | 11                     | Water          | 160               | 80                    | 1               | 100                   | 76                   | 1            |
| Cu/ZnAl-500               | 5                      | Water          | 150               | 40                    | 6               |                       | 62                   | 2            |
| Ni/TiO <sub>2</sub> -450  | 1                      | Water          | 140               | 10                    | 6               | 74.7                  | 65.6                 | 3            |
| Pd UiO-66-NO <sub>2</sub> | 1.04                   | Water          | 150               | 10                    | 5               | 98.9                  | 96.6                 | 4            |
| Pt/NC-BS-800              | 2.5                    | Water          | 150               | 30                    | 4               | >99                   | 76.0                 | 5            |
| Pt/TiO <sub>2</sub> NR    | 26                     | Water          | 170               | 20                    | 2               | 98                    | 49.4                 | This work    |

## References)

1. M. Hronec and K. Fulajtarova, "Selective transformation of furfural to cyclopentanone", *Catal. Comm.* 24 (2012) 100-104.
2. J. Gao et al. "Selective conversion of furfural to cyclopentanone with CuZnAl catalysts", *ACS Sustain. Chem. Eng.* 2 (2014) 2259-2266.
3. S. Chen et al. "Hydrogenation of furfural to cyclopentanone under mild conditions by a structure-optimized Ni-NiO/TiO<sub>2</sub> heterojunction catalyst", *ChemSusChem* 13 (2020) 5507-5515.
4. C. Wang et al. "Hydrogenative ring-rearrangement of furfural to cyclopentanone over Pd/UiO-66-NO<sub>2</sub> with tunable missing-linker defects", *Molecules* 26 (2021) 5736.
5. X. Liu et al." Tunable and selective hydrogenation of furfural to furfuryl alcohol and cyclopentanone over Pt supported on biomass-derived porous heteroatom doped carbon", *Faraday Discussions* 202 (2017) 79-98.
